# Supplementary material for: Skin-inspired laminated liquid metal doped hydrogel with mechanical toughness and high electrical conductivity
Source: Royal Society of Chemistry journal article supplement (doi:10.1039/d4tc03817g), 2024-01-01
Supplement: d4tc03817g4.pdf [file d4tc03817g4.pdf]

## Supporting Information

### **Skin-inspired laminated liquid metal doped hydrogel with mechanical toughness and high electrical conductivity**

Junlong Wang<sup>a</sup>, Xiaosheng Huo<sup>a</sup>, Wenjun Huang<sup>a</sup>, Junbin Xu<sup>b</sup>, Pengcheng Yu<sup>b</sup>,  
Xiangqian Zhang<sup>b</sup>, Zhenhua Cong<sup>a\*</sup>, Jian Niu<sup>b\*</sup>

a. Nano and Heterogeneous Materials Center, School of Materials Science and Engineering, Nanjing University of Science and Technology, Nanjing, Jiangsu 210094, China.

b. State Key Laboratory for Organic Electronics and Information Displays & Institute of Advanced Materials (IAM), Jiangsu National Synergetic Innovation Center for Advanced Materials (SICAM), Nanjing University of Posts & Telecommunications, Nanjing 210023, China.

\*E-mail: zhcong@njust.edu.cn; iamjniu@njupt.edu.cn

The force analysis of LMPs was conducted (simplified to the sedimentation process of uniformly dispersed LMPs in the solution, ignoring the impact of solvent loss). The LMPs are primarily subjected to three forces: their own gravity  $F_g$ , the buoyancy  $F_b$  exerted by the solution on the LMPs, and the friction  $F_d$  during the sedimentation process. The formula for each force is as follows:

The gravity of the LMPs is:

$$F_g = \frac{1}{6}\pi d^3 \rho_{LM} g \quad (1)$$

where  $d$  is the diameter of the LMPs,  $\rho_{LM}$  is the density of the LMPs, and  $g$  is the gravitational acceleration.

The buoyancy of the solution on the LMPs is:

$$F_b = \frac{1}{6}\pi d^3 \rho_{PPS} g \quad (2)$$

where  $\rho_{PPS}$  is the density of the PVA-PEDOT:PSS solution.

Due to the viscosity of the liquid, the frictional force experienced by the LMPs during sedimentation in the solution is:

$$F_d = 3\pi d\eta v \quad (3)$$

where  $\eta$  is the viscosity coefficient of the solution and  $v$  is the sedimentation velocity of the LMPs. When the LMPs begin to sediment,  $v$  is initially small, resulting in a small  $F_d$ . As gravity causes  $v$  to gradually increase, it eventually reaches a certain value, at which point the LMPs achieve force equilibrium, given by:

$$F_g - F_b - F_d = 0 \quad (4)$$

Substitute equations (1) to (3) into equation (4):

$$\frac{1}{6}\pi d^3(\rho_{LM} - \rho_{PPS})g - 3\pi d\eta v = 0 \quad (5)$$

$$v = \frac{(\rho_{LM} - \rho_{PPS})}{18\eta} g d^2 \quad (6)$$

From equation (6), it is evident that the sedimentation velocity of the LMPs is proportional to the square of their diameter.

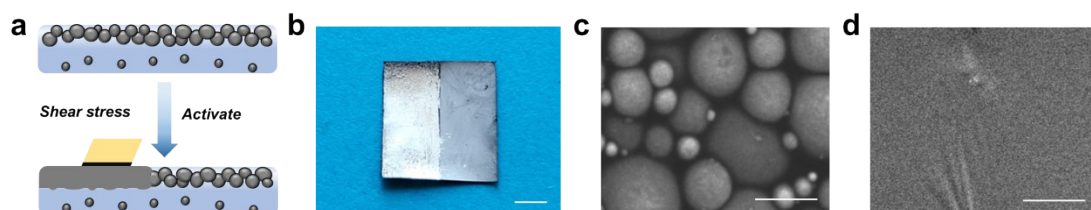

**Figure S1.** Activation of the LM conductive layer via shear stress.

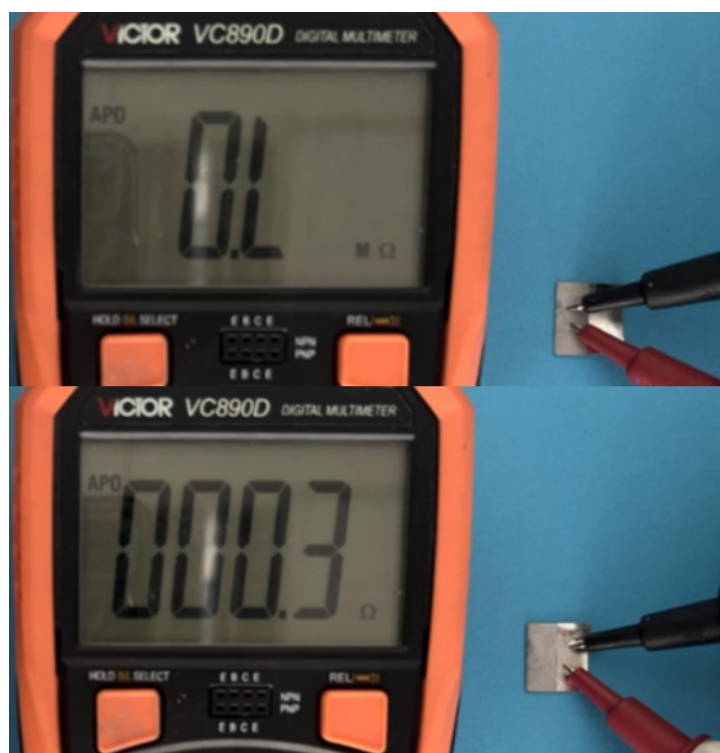

**Figure S2.** Resistance values of activated and deactivated parts of PPS<sub>2</sub>LM<sub>1.5</sub> film.

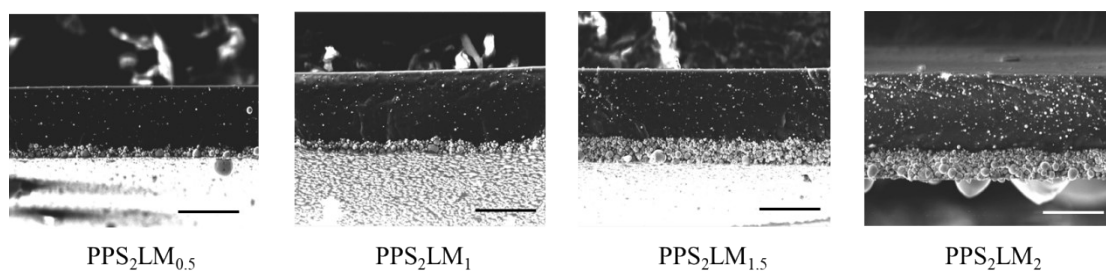

**Figure S3.** SEM image of cross-section of PPSLM film with different LM contents (Scale: 40  $\mu\text{m}$ ).

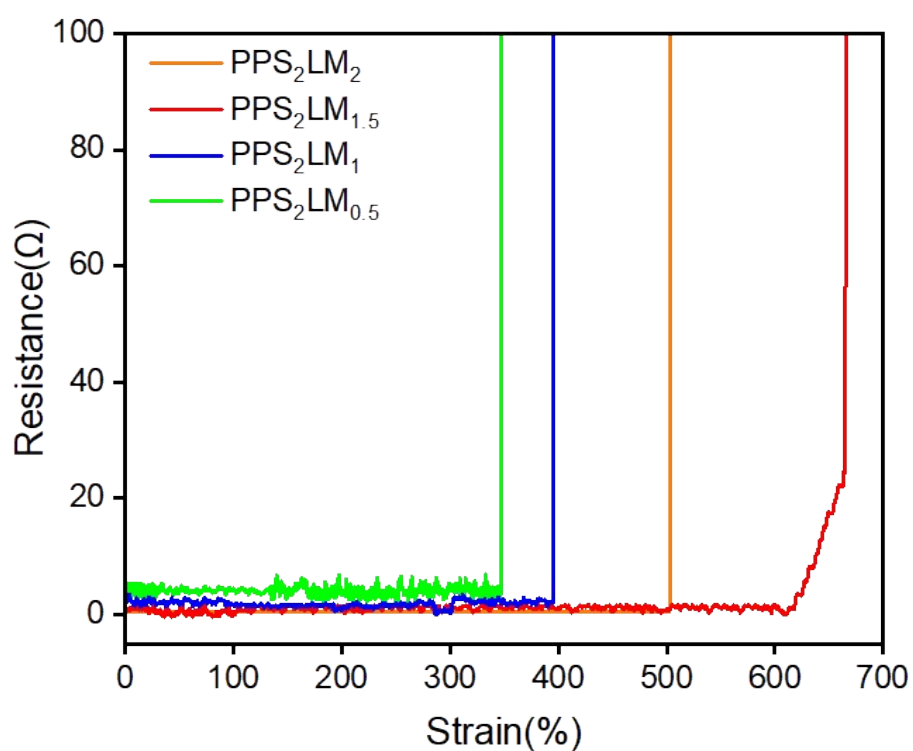

**Figure S4.** Resistance-Strain curve of PPSLM film with different LM contents.

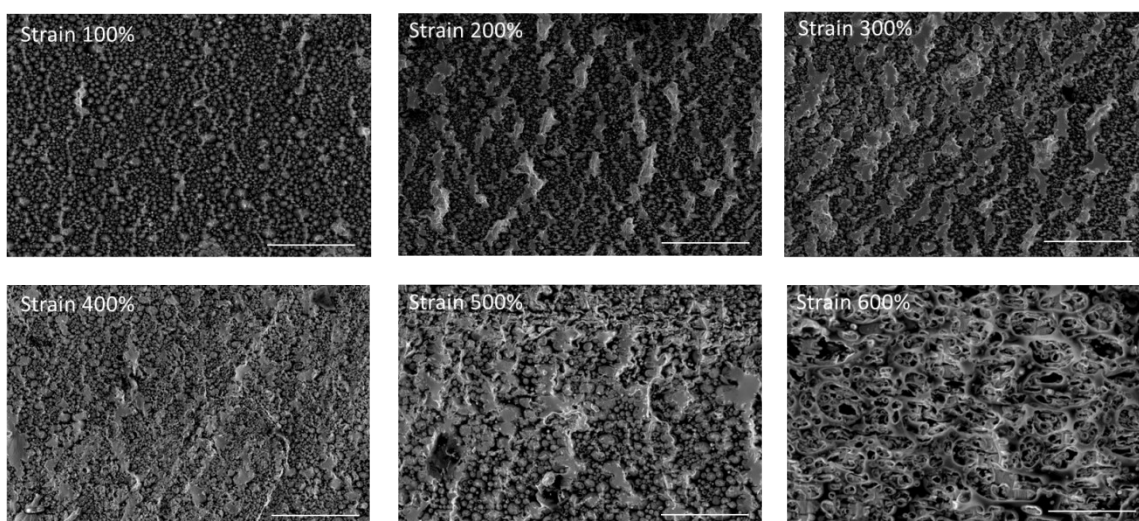

**Figure S5.** SEM image of the bottom of the PPS<sub>2</sub>LM<sub>1.5</sub> film under different strain (Scale: 100  $\mu$ m).

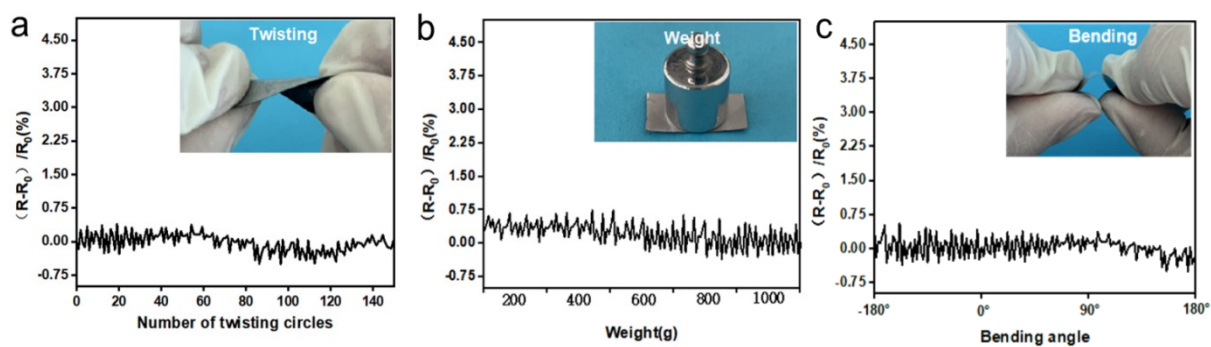

**Figure S6.** Resistance changes of PPS<sub>2</sub>LM<sub>1.5</sub> film under Torsion a), Pressure b), and Bending c).

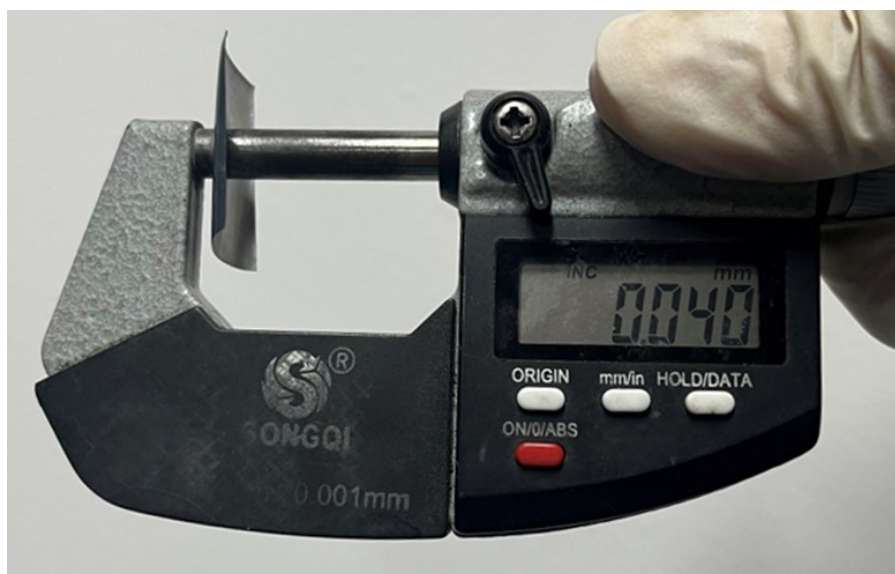

Figure S7. PPS<sub>2</sub>LM<sub>1,5</sub> film thickness.

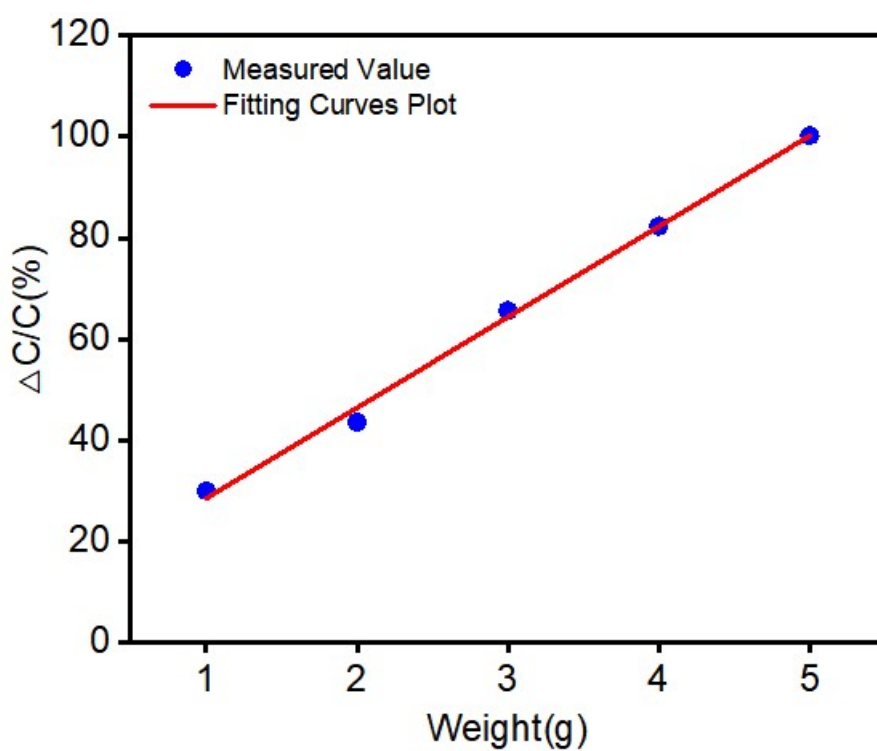

Figure S8. Fitting curve of weight and capacitance response.

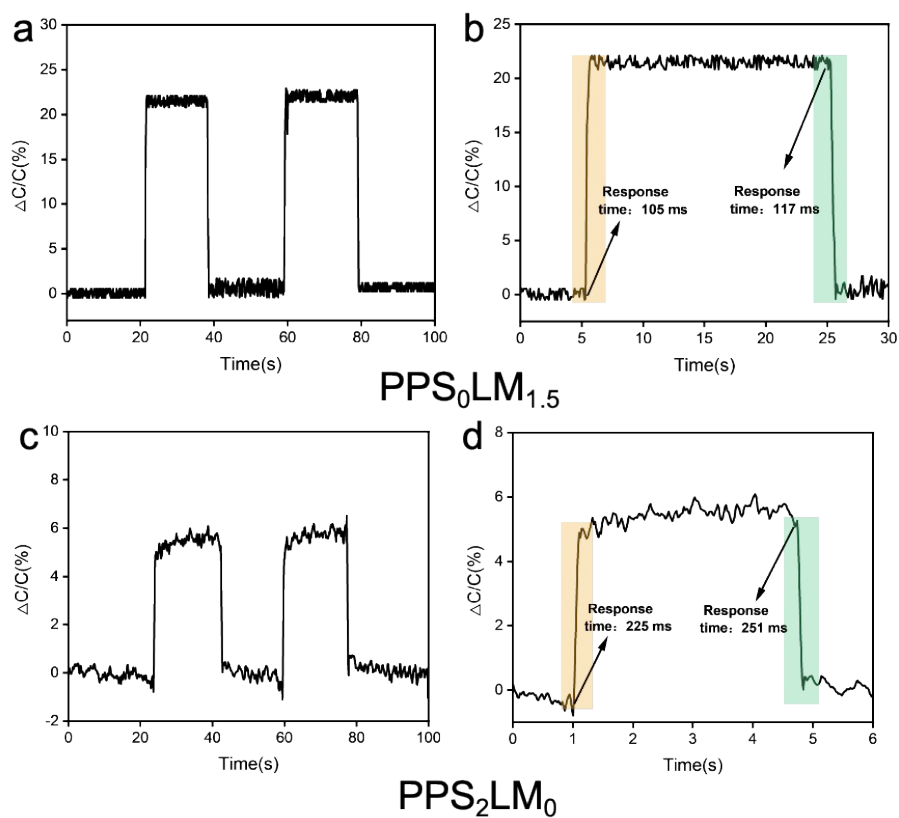

**Figure S9.** Capacitance response of a sensor based on a, b) PPS<sub>0</sub>LM<sub>1.5</sub> and c, d) PPS<sub>2</sub>LM<sub>0</sub> hydrogel films.

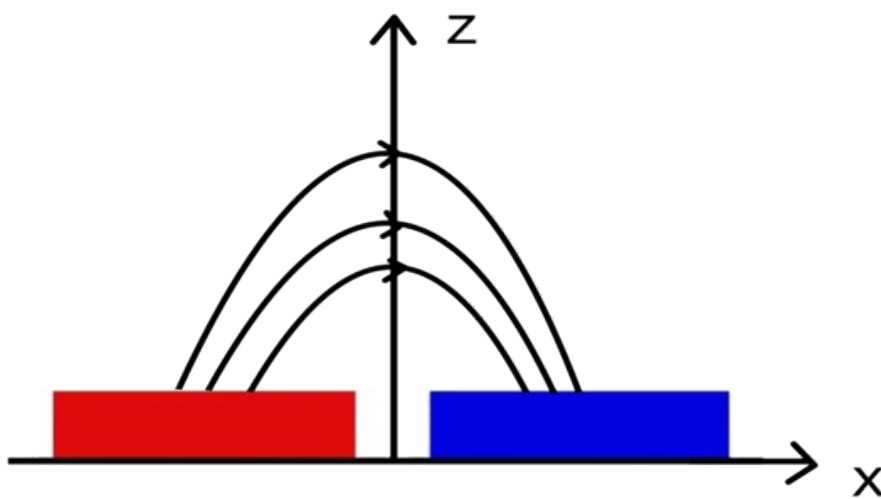

**Figure S10.** Schematic diagram of electric field lines in crossed finger electrodes.

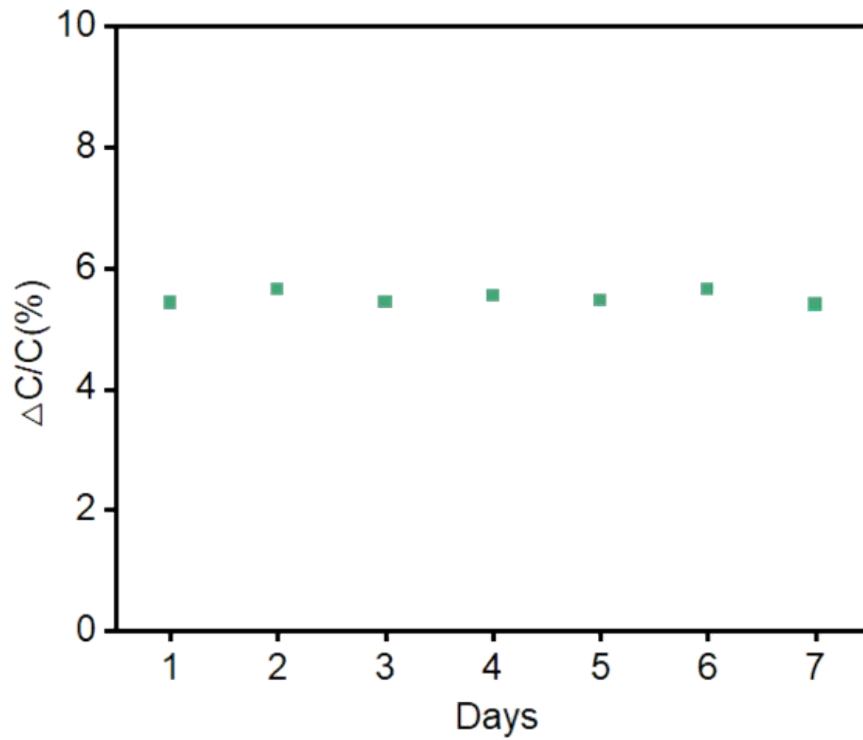

**Figure S11.** Stability of PPS<sub>2</sub>LM<sub>1.5</sub> contactless capacitive sensor.

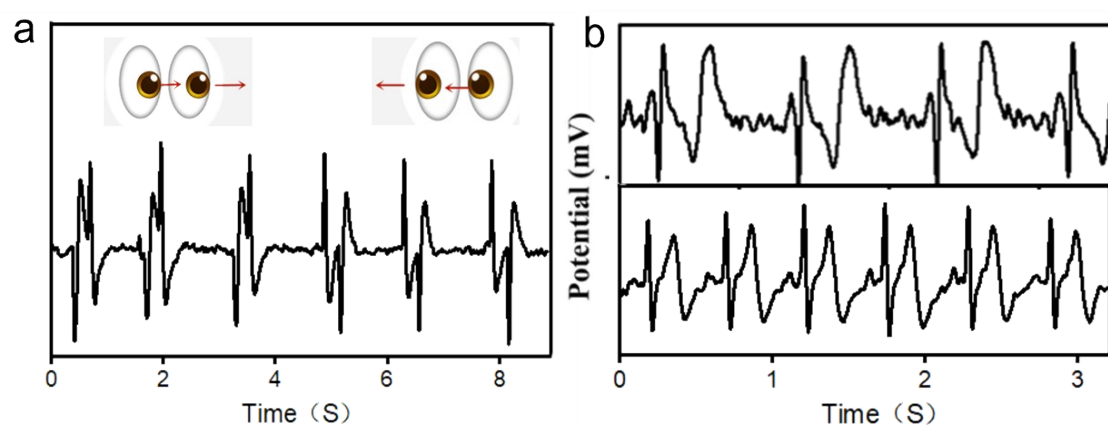

**Figure S12.** Detection of human bioelectrical signals by PPS<sub>2</sub>LM<sub>1.5</sub> film electrodes. a) Eye signal response. b) Heart signal response before and after exercise.



**Table S1.** Comparison of our PPSLM hydrogel with some previously reported conductive hydrogels

| Materials               | Tensile strain | Tensile stress (MPa) | Conductivity (S/m)                   | Ref.             |
|-------------------------|----------------|----------------------|--------------------------------------|------------------|
| LM/PEDOT:PSS/PVA (LMPP) | 380%           | 0.088                | 4.85                                 | 1                |
| LM/PAA/PVA              | 600%           | 1.5                  | 10.3                                 | 2                |
| PVA/EGaInSn–Ni          | 800%           | -                    | 0.04                                 | 3                |
| PVA-LMPs                | -              | -                    | 0.375                                | 4                |
| PEDOT:PSS-PVA           | 300%           | -                    | -                                    | 5                |
| DFS PEDOT:PSS-PVA       | 600%           | 0.84                 | 0.32                                 | 6                |
| PEDOT:PSS/PVA           | 150%           | 0.75                 | 1000                                 | 7                |
| LM-CNF-PVA              | 140%           | 0.3                  | $3.1 \times 10^5$                    | 8                |
| AgNWs-LM-PVA            | 3000%          | 33                   | 24                                   | 9                |
| <b>PPSLM</b>            | <b>818%</b>    | <b>24.6</b>          | <b><math>1.67 \times 10^5</math></b> | <b>This work</b> |

### Supplementary References

1. K. Zhao, Y. Zhao, J. Xu, R. Qian, Z. Yu, C. Ye, *Chemical Engineering Journal* **2024**, *494*, 152971.
2. J. Zhang, J. Liao, Z. Liu, R. Zhang, M. Sitti, *Adv Funct Materials* **2024**, *34*, 2308238.
3. B. Zhao, Z. Bai, H. Lv, Z. Yan, Y. Du, X. Guo, J. Zhang, L. Wu, J. Deng, D. W. Zhang, R. Che, *Nano-Micro Lett.* **2023**, *15*, 79.
4. M. Liao, H. Liao, J. Ye, P. Wan, L. Zhang, *ACS Appl. Mater. Interfaces* **2019**, *11*, 47358.

5. G. Li, K. Huang, J. Deng, M. Guo, M. Cai, Y. Zhang, C. F. Guo, *Advanced Materials* **2022**, *34*, 2200261.
6. Z. Shen, Z. Zhang, N. Zhang, J. Li, P. Zhou, F. Hu, Y. Rong, B. Lu, G. Gu, *Advanced Materials* **2022**, *34*, 2203650.
7. Z. Zhang, G. Chen, Y. Xue, Q. Duan, X. Liang, T. Lin, Z. Wu, Y. Tan, Q. Zhao, W. Zheng, L. Wang, F. Wang, X. Luo, J. Xu, J. Liu, B. Lu, *Adv Funct Materials* **2023**, *33*, 2305705.
8. X. Li, P. Zhu, S. Zhang, X. Wang, X. Luo, Z. Leng, H. Zhou, Z. Pan, Y. Mao, *ACS Nano* **2022**, *16*, 5909.
9. X. Wang, S. Zheng, J. Xiong, Z. Liu, Q. Li, W. Li, F. Yan, *Advanced Materials* **2024**, 2313845.
